# Supplementary material
Source: publisher site journal article supplement (https://www.spandidos-publications.com/5281/downloadSupplementary)
Supplement: Supplementary file 1 [file downloadSupplementary]

## Sheet: GSE55092-common-DERs
Table SIIA. Differentially expressed RNAs in GSE55092 overlapping with GSE121248.
Symbol	ID	Type	FDR	P-value	logFC
LINC01093	1559573_at	lncRNA	3.29e-51	1.2e-55	-4.6
H19	224646_x_at	lncRNA	2.95e-08	3.71e-09	-2.12
DNM3OS	232090_at	lncRNA	8.03e-22	1.26e-23	-1.75
LINC01146	1559363_at	lncRNA	2.13e-17	6.5e-19	-1.59
LINC01018	1559033_at	lncRNA	2.35e-15	9.81e-17	-1.58
LINC00844	230577_at	lncRNA	0.00143	0.000434	-1.456
MAGI2-AS3	227554_at	lncRNA	7.44e-09	8.45e-10	-1.452
HAND2-AS1	219791_s_at	lncRNA	9.8e-22	1.56e-23	-1.44
MIR22HG	214696_at	lncRNA	4.63e-21	8.26e-23	-1.44
SOCS2-AS1	1559315_s_at	lncRNA	1.35e-12	8.57e-14	-1.389
LINC00261	228004_at	lncRNA	4.36e-09	4.76e-10	-1.18
DBH-AS1	230488_s_at	lncRNA	9.2e-05	2.16e-05	-1.12
DHRS4-AS1	227446_s_at	lncRNA	1.97e-07	2.85e-08	-1.112
HHIP-AS1	236632_at	lncRNA	4.03e-18	1.11e-19	-1.106
PWAR6	226587_at	lncRNA	0.00981	0.0037	-1.106
ADAMTS9-AS2	1556364_at	lncRNA	0.000162	4.01e-05	-1.04
FLVCR1-AS1	235126_at	lncRNA	5.98e-15	2.65e-16	1.02
LINC01003	235174_s_at	lncRNA	1.38e-06	2.32e-07	1.037
ZEB1-AS1	229090_at	lncRNA	2.26e-20	4.44e-22	1.04
PCAT6	231233_at	lncRNA	8.82e-22	1.39e-23	1.26
LINC00528	1556072_at	lncRNA	2.16e-17	6.61e-19	1.295
LINC00205	226995_at	lncRNA	1.28e-13	6.84e-15	1.3
DSCR8	241224_x_at	lncRNA	4.61e-05	1.02e-05	1.3
RUSC1-AS1	1552862_at	lncRNA	1.35e-11	9.97e-13	1.374
TAPT1-AS1	1553145_at	lncRNA	2.95e-16	1.08e-17	1.39
LINC00622	1558404_at	lncRNA	3.28e-11	2.57e-12	1.411
DNAJC3-AS1	240574_at	lncRNA	1.16e-20	2.19e-22	1.454
ITPR1-AS1	239764_at	lncRNA	6.38e-12	4.46e-13	1.465
LINC01004	235217_at	lncRNA	4.15e-15	1.8e-16	1.54
ST8SIA6-AS1	242350_s_at	lncRNA	8.51e-29	3.91e-31	1.62
HAMP	220491_at	mRNA	3.29e-51	7.31e-56	-5.26
C9	206727_at	mRNA	6.49e-23	8.49e-25	-5.25
AKR1D1	207102_at	mRNA	2.48e-31	7.2e-34	-4.73
SLC22A1	207201_s_at	mRNA	3.19e-29	1.32e-31	-4.71
C7	202992_at	mRNA	1.6e-22	2.24e-24	-4.54
OIT3	230478_at	mRNA	1.11e-44	3.05e-48	-4.45
FCN2	207804_s_at	mRNA	4.71e-42	2.16e-45	-4.36
IGF2	202409_at	mRNA	2.09e-46	4.97e-50	-4.34
CLEC1B	220496_at	mRNA	1.91e-50	1.05e-54	-4.16
HAL	206643_at	mRNA	2.08e-27	1.24e-29	-4.16
SPP2	214478_at	mRNA	5.28e-38	4.83e-41	-4.15
FCN3	205866_at	mRNA	3.74e-46	9.57e-50	-4.08
ALDOB	204704_s_at	mRNA	1.66e-27	9.72e-30	-3.93
DCN	201893_x_at	mRNA	1.57e-22	2.18e-24	-3.9
FOS	209189_at	mRNA	2.33e-32	5.38e-35	-3.88
PCK1	208383_s_at	mRNA	1.77e-31	4.94e-34	-3.81
HAO2	220801_s_at	mRNA	1.2e-41	5.72e-45	-3.75
FBP1	209696_at	mRNA	4.15e-36	5.23e-39	-3.75
MT1M	217546_at	mRNA	1.74e-30	5.95e-33	-3.73
SLCO1B3	206354_at	mRNA	5.14e-21	9.25e-23	-3.73
LUM	201744_s_at	mRNA	7.84e-13	4.77e-14	-3.68
CLEC4G	1559065_a_at	mRNA	1.1e-40	6.86e-44	-3.65
CA2	209301_at	mRNA	1.46e-26	9.85e-29	-3.63
CRHBP	205984_at	mRNA	6.29e-37	6.78e-40	-3.62
HGF	209960_at	mRNA	1.38e-28	6.47e-31	-3.62
FGFR2	203638_s_at	mRNA	1.67e-23	1.95e-25	-3.57
CXCL14	218002_s_at	mRNA	1.12e-46	2.25e-50	-3.5
CNDP1	223699_at	mRNA	7.48e-30	2.85e-32	-3.49
MFSD2A	225316_at	mRNA	3.11e-43	9.68e-47	-3.48
MARCO	205819_at	mRNA	2.64e-28	1.33e-30	-3.48
GNMT	210328_at	mRNA	4.1e-24	4.2e-26	-3.43
CYP1A2	207608_x_at	mRNA	5.41e-27	3.44e-29	-3.42
TDO2	205943_at	mRNA	1.2e-27	6.65e-30	-3.4
CYP2B6	206754_s_at	mRNA	1.91e-25	1.55e-27	-3.38
PGLYRP2	242817_at	mRNA	1.43e-22	1.98e-24	-3.37
FREM2	230964_at	mRNA	1.4e-35	1.92e-38	-3.33
CXCL12	203666_at	mRNA	2.92e-34	4.92e-37	-3.33
FOSB	202768_at	mRNA	6.2e-23	8.03e-25	-3.31
GHR	205498_at	mRNA	1.56e-28	7.46e-31	-3.29
CYP26A1	206424_at	mRNA	1.01e-31	2.7e-34	-3.28
SLC25A47	237765_at	mRNA	2.07e-47	3.78e-51	-3.27
ESR1	205225_at	mRNA	7.8e-43	2.85e-46	-3.23
CNTN3	229831_at	mRNA	6.15e-24	6.68e-26	-3.23
CLEC4M	207995_s_at	mRNA	1.25e-35	1.67e-38	-3.22
NNMT	202237_at	mRNA	1.6e-17	4.8e-19	-3.2
HSD17B2	204818_at	mRNA	1.04e-23	1.17e-25	-3.18
GADD45B	207574_s_at	mRNA	1.5e-41	7.42e-45	-3.17
KCNN2	220116_at	mRNA	1.78e-29	7.18e-32	-3.17
CYP2A6	1494_f_at	mRNA	8.83e-24	9.77e-26	-3.16
CYP2C8	208147_s_at	mRNA	7.3e-27	4.76e-29	-3.15
SLC51A	229230_at	mRNA	4.43e-21	7.87e-23	-3.14
SRPX	204955_at	mRNA	2.84e-20	5.63e-22	-3.12
KMO	205306_x_at	mRNA	3.61e-32	8.45e-35	-3.11
APOF	207262_at	mRNA	2.53e-30	9.03e-33	-3.11
GPM6A	209469_at	mRNA	1.75e-17	5.29e-19	-3.1
TTC36	237350_at	mRNA	1.96e-42	7.62e-46	-3.09
PLAC8	219014_at	mRNA	3.94e-32	9.58e-35	-3.07
ID4	209291_at	mRNA	4.25e-27	2.67e-29	-3.06
GRAMD1C	219313_at	mRNA	2.5e-36	2.84e-39	-3.03
FAM110C	226863_at	mRNA	9.47e-19	2.38e-20	-2.98
GYS2	214621_at	mRNA	6.56e-23	8.6e-25	-2.97
IDO2	1568638_a_at	mRNA	5.46e-35	8.19e-38	-2.96
LPA	207584_at	mRNA	3.99e-23	4.97e-25	-2.96
CYP39A1	1553977_a_at	mRNA	4.19e-30	1.55e-32	-2.95
ACOT12	238160_at	mRNA	8.6e-25	7.74e-27	-2.95
FABP1	205892_s_at	mRNA	1.38e-21	2.24e-23	-2.94
VNN1	1558549_s_at	mRNA	1.09e-24	9.93e-27	-2.92
IGF1	209540_at	mRNA	1e-23	1.13e-25	-2.9
IL13RA2	206172_at	mRNA	1.76e-22	2.5e-24	-2.88
C6	210168_at	mRNA	3.08e-18	8.29e-20	-2.88
ADH4	223781_x_at	mRNA	3.53e-22	5.26e-24	-2.86
PRG4	206007_at	mRNA	4.02e-35	5.88e-38	-2.85
ASPA	206030_at	mRNA	2.94e-23	3.6e-25	-2.76
MT1E	212859_x_at	mRNA	8.02e-34	1.45e-36	-2.75
COLEC11	219873_at	mRNA	3.91e-25	3.32e-27	-2.75
ZG16	214142_at	mRNA	8.32e-33	1.81e-35	-2.73
ID1	208937_s_at	mRNA	9.32e-22	1.48e-23	-2.71
MT1G	204745_x_at	mRNA	9.65e-30	3.72e-32	-2.7
MT1H	206461_x_at	mRNA	1.74e-31	4.85e-34	-2.69
ASPN	219087_at	mRNA	2.16e-14	1.03e-15	-2.69
ANXA10	210143_at	mRNA	3.55e-25	2.98e-27	-2.68
CD5L	206680_at	mRNA	1.17e-29	4.61e-32	-2.66
MT1F	210524_x_at	mRNA	7.42e-31	2.32e-33	-2.65
NAT2	206797_at	mRNA	1.9e-28	9.25e-31	-2.65
AFM	206840_at	mRNA	3.87e-16	1.46e-17	-2.65
SLC10A1	207185_at	mRNA	2.71e-24	2.67e-26	-2.64
CETP	206210_s_at	mRNA	2.55e-33	5.09e-36	-2.63
CYP2C18	208126_s_at	mRNA	2.3e-25	1.88e-27	-2.63
CD69	209795_at	mRNA	2.85e-16	1.04e-17	-2.63
MT1X	204326_x_at	mRNA	4.58e-29	1.97e-31	-2.62
ADH1A	207820_at	mRNA	1.15e-13	6.15e-15	-2.62
LCAT	204428_s_at	mRNA	2.51e-39	2.02e-42	-2.59
RSPO3	228186_s_at	mRNA	8.73e-40	6.7e-43	-2.58
MBL2	207256_at	mRNA	3.11e-15	1.32e-16	-2.57
NPY1R	205440_s_at	mRNA	3.69e-28	1.89e-30	-2.55
GCH1	204224_s_at	mRNA	2.36e-34	3.93e-37	-2.53
TMEM45A	219410_at	mRNA	5.13e-16	1.97e-17	-2.53
BBOX1	205363_at	mRNA	4.05e-15	1.75e-16	-2.53
BCO2	232449_at	mRNA	1.23e-27	6.83e-30	-2.51
CLRN3	229777_at	mRNA	2.11e-14	1.01e-15	-2.49
RND3	212724_at	mRNA	3.31e-25	2.76e-27	-2.48
HPGD	203913_s_at	mRNA	9.8e-14	5.14e-15	-2.48
CYP2E1	1431_at	mRNA	1.73e-07	2.48e-08	-2.48
OLFML3	218162_at	mRNA	5.47e-23	7.05e-25	-2.46
SLC25A18	223605_at	mRNA	1.35e-19	2.95e-21	-2.46
RCAN1	208370_s_at	mRNA	3.75e-32	8.85e-35	-2.44
EPHA3	206070_s_at	mRNA	1.7e-14	8.01e-16	-2.44
RDH16	206753_at	mRNA	6.94e-29	3.11e-31	-2.43
SLC27A2	205768_s_at	mRNA	3.27e-19	7.62e-21	-2.42
FETUB	210521_s_at	mRNA	9.57e-18	2.8e-19	-2.42
TBX15	230438_at	mRNA	2.78e-27	1.7e-29	-2.41
MT2A	212185_x_at	mRNA	1.89e-33	3.67e-36	-2.4
COLEC10	207420_at	mRNA	2.68e-26	1.88e-28	-2.4
GBA3	219954_s_at	mRNA	3.52e-22	5.23e-24	-2.38
MT1HL1	211456_x_at	mRNA	8.33e-31	2.65e-33	-2.34
ANK3	206385_s_at	mRNA	2.62e-21	4.48e-23	-2.31
F9	207218_at	mRNA	3.51e-13	2.03e-14	-2.31
SLCO4C1	222071_s_at	mRNA	4.93e-23	6.31e-25	-2.3
HBB	209116_x_at	mRNA	3.27e-16	1.21e-17	-2.29
ASS1	207076_s_at	mRNA	1.3e-36	1.42e-39	-2.27
ACADL	206068_s_at	mRNA	7.66e-18	2.2e-19	-2.27
LECT2	207409_at	mRNA	2.58e-08	3.2e-09	-2.27
CCBE1	229641_at	mRNA	1.78e-29	7.18e-32	-2.25
IGFBP3	210095_s_at	mRNA	8.89e-23	1.19e-24	-2.25
C11orf96	227099_s_at	mRNA	2.71e-22	3.95e-24	-2.24
HPX	210013_at	mRNA	7.12e-13	4.31e-14	-2.24
UNC93A	214382_at	mRNA	3.32e-18	8.98e-20	-2.22
DSEL	232235_at	mRNA	1.29e-21	2.09e-23	-2.2
GEM	204472_at	mRNA	1.4e-13	7.6e-15	-2.2
HGFAC	207027_at	mRNA	8.42e-27	5.56e-29	-2.19
CFTR	205043_at	mRNA	1.06e-21	1.69e-23	-2.18
BHMT	206119_at	mRNA	5.88e-16	2.27e-17	-2.18
CYP2C9	214421_x_at	mRNA	1.86e-21	3.09e-23	-2.17
ZFPM2	219778_at	mRNA	4.9e-16	1.87e-17	-2.16
SLC13A5	228844_at	mRNA	1.1e-12	6.86e-14	-2.16
SPATA18	229331_at	mRNA	1.98e-18	5.19e-20	-2.15
ATF5	204998_s_at	mRNA	4.63e-23	5.89e-25	-2.13
PTGIS	208131_s_at	mRNA	7.5e-17	2.49e-18	-2.13
ARG1	206177_s_at	mRNA	1.67e-11	1.25e-12	-2.13
CXCL2	1569203_at	mRNA	1.35e-23	1.55e-25	-2.1
GABRP	205044_at	mRNA	6.92e-18	1.96e-19	-2.1
CYP3A43	207773_x_at	mRNA	4.75e-16	1.81e-17	-2.1
HPD	206024_at	mRNA	6.9e-10	6.63e-11	-2.09
CHST4	220446_s_at	mRNA	1.08e-23	1.22e-25	-2.08
CIDEB	221188_s_at	mRNA	3.22e-30	1.18e-32	-2.07
DEFB1	210397_at	mRNA	4.02e-11	3.2e-12	-2.07
CSRNP1	225557_at	mRNA	3.79e-32	9.08e-35	-2.06
ADCY1	213245_at	mRNA	3.57e-16	1.33e-17	-2.06
SOCS2	203372_s_at	mRNA	2.28e-28	1.14e-30	-2.04
KDM8	220070_at	mRNA	1.92e-48	2.8e-52	-2.03
STAB2	220114_s_at	mRNA	1.96e-42	8.25e-46	-2.03
PPP1R1A	205478_at	mRNA	2.76e-30	1e-32	-2.02
FTCD	220604_x_at	mRNA	1.62e-22	2.26e-24	-2.02
ZFP36	201531_at	mRNA	1.33e-28	6.21e-31	-2.01
EGR1	201693_s_at	mRNA	1.8e-26	1.23e-28	-2.01
CDHR2	220186_s_at	mRNA	1.36e-29	5.45e-32	-2
BGN	201261_x_at	mRNA	2.6e-19	5.98e-21	-1.99
MRC1	204438_at	mRNA	1.03e-11	7.43e-13	-1.99
CYFIP2	215785_s_at	mRNA	9.86e-23	1.33e-24	-1.98
SRD5A2	206938_at	mRNA	9.77e-15	4.43e-16	-1.98
GLYATL1	227695_at	mRNA	3.61e-26	2.62e-28	-1.97
PIK3C2G	215129_at	mRNA	2.33e-19	5.32e-21	-1.97
CYP4V2	226745_at	mRNA	5.37e-28	2.83e-30	-1.96
GLDC	204836_at	mRNA	5e-18	1.39e-19	-1.96
KCNJ16	219564_at	mRNA	3.3e-17	1.03e-18	-1.96
IL1RAP	205227_at	mRNA	1.34e-35	1.81e-38	-1.95
SLC3A1	205799_s_at	mRNA	1.54e-06	2.6e-07	-1.95
CXCL6	206336_at	mRNA	1.69e-06	2.88e-07	-1.94
A1BG	229819_at	mRNA	2.49e-12	1.63e-13	-1.93
SERPINA4	213874_at	mRNA	3.2e-17	9.98e-19	-1.92
TUBE1	226181_at	mRNA	7.64e-31	2.42e-33	-1.91
GPR182	1552440_at	mRNA	1.51e-30	5.08e-33	-1.91
KBTBD11	204301_at	mRNA	6.31e-25	5.48e-27	-1.91
C8B	206979_at	mRNA	1.4e-22	1.93e-24	-1.9
INMT	224061_at	mRNA	1.17e-16	3.97e-18	-1.9
GREM2	220794_at	mRNA	2.68e-16	9.79e-18	-1.9
CDC37L1	219343_at	mRNA	8.44e-28	4.6e-30	-1.89
PCDH9	219737_s_at	mRNA	7.75e-24	8.49e-26	-1.89
APOA5	224243_at	mRNA	1.09e-20	2.04e-22	-1.89
OGDHL	219277_s_at	mRNA	1.14e-22	1.55e-24	-1.88
LY6E	202145_at	mRNA	3.14e-27	1.93e-29	-1.87
INHBE	210587_at	mRNA	1.76e-13	9.68e-15	-1.87
CYP2C19	216058_s_at	mRNA	1.49e-22	2.06e-24	-1.86
OAT	201599_at	mRNA	4.19e-22	6.29e-24	-1.86
CYP4A11	1554837_a_at	mRNA	6.31e-20	1.32e-21	-1.86
FEZ1	203562_at	mRNA	5.65e-28	3e-30	-1.85
NR4A2	204621_s_at	mRNA	2.12e-17	6.45e-19	-1.85
MASP2	207041_at	mRNA	5.96e-16	2.3e-17	-1.85
MAN1C1	214180_at	mRNA	9.73e-26	7.64e-28	-1.84
ACMSD	230602_at	mRNA	3.14e-20	6.29e-22	-1.84
CLDN10	205328_at	mRNA	5.96e-16	2.31e-17	-1.83
SDS	1555539_at	mRNA	8.2e-18	2.37e-19	-1.82
PLG	1558603_at	mRNA	3.73e-28	1.92e-30	-1.81
FOLH1	205860_x_at	mRNA	4.25e-18	1.17e-19	-1.8
ECM1	209365_s_at	mRNA	8.89e-32	2.33e-34	-1.79
ZGPAT	221848_at	mRNA	4.41e-29	1.86e-31	-1.79
ETNPPL	221008_s_at	mRNA	2.63e-14	1.27e-15	-1.79
PLIN2	209122_at	mRNA	7.08e-30	2.68e-32	-1.78
KAZN	213478_at	mRNA	8.95e-24	9.97e-26	-1.78
BASP1	202391_at	mRNA	2.06e-13	1.14e-14	-1.78
SERPINA7	206386_at	mRNA	1.34e-10	1.15e-11	-1.78
SAA4	207096_at	mRNA	2.03e-21	3.39e-23	-1.77
KLKB1	206541_at	mRNA	1.86e-24	1.79e-26	-1.76
PANK1	226649_at	mRNA	2.49e-24	2.44e-26	-1.76
ACSL1	201963_at	mRNA	1.25e-22	1.71e-24	-1.76
DMGDH	231790_at	mRNA	1.98e-21	3.29e-23	-1.76
FNDC5	226096_at	mRNA	8.42e-16	3.31e-17	-1.76
TSLP	235737_at	mRNA	1.08e-15	4.31e-17	-1.75
FBLN5	203088_at	mRNA	2.46e-10	2.21e-11	-1.75
BCHE	205433_at	mRNA	1.12e-16	3.81e-18	-1.73
PRKAR2B	203680_at	mRNA	5.68e-15	2.51e-16	-1.73
CFHR3	207874_s_at	mRNA	1.05e-10	8.91e-12	-1.73
SERPINA5	209443_at	mRNA	9.49e-18	2.77e-19	-1.72
CFP	206380_s_at	mRNA	1.87e-26	1.29e-28	-1.71
ENO3	204483_at	mRNA	4.29e-18	1.18e-19	-1.7
HABP2	206010_at	mRNA	3.33e-13	1.92e-14	-1.69
FXYD1	205384_at	mRNA	1.26e-24	1.17e-26	-1.67
TMEM154	238063_at	mRNA	1.38e-16	4.78e-18	-1.67
SLC38A4	1555345_at	mRNA	2.88e-15	1.22e-16	-1.67
LHX2	206140_at	mRNA	2.36e-14	1.14e-15	-1.67
TRIB1	202241_at	mRNA	3.93e-18	1.07e-19	-1.66
CYP4F2	206514_s_at	mRNA	2.85e-18	7.63e-20	-1.65
ADH1C	206262_at	mRNA	1.31e-11	9.67e-13	-1.65
EHD3	218935_at	mRNA	1.74e-24	1.66e-26	-1.64
PHGDH	201397_at	mRNA	1.2e-20	2.28e-22	-1.64
RGS2	202388_at	mRNA	6.36e-09	7.13e-10	-1.64
RCL1	218544_s_at	mRNA	2.69e-22	3.91e-24	-1.63
CNTN4	229084_at	mRNA	1.18e-23	1.35e-25	-1.61
ADH1B	209612_s_at	mRNA	1.8e-05	3.68e-06	-1.61
EPHA2	203499_at	mRNA	4.48e-26	3.33e-28	-1.6
PLCXD3	230081_at	mRNA	3.27e-13	1.88e-14	-1.6
MOGAT2	232428_at	mRNA	1.45e-20	2.78e-22	-1.59
CD1D	205789_at	mRNA	5.25e-19	1.27e-20	-1.59
TEK	206702_at	mRNA	4.02e-15	1.74e-16	-1.59
MXRA5	209596_at	mRNA	4.83e-14	2.43e-15	-1.59
IL33	209821_at	mRNA	1.57e-11	1.17e-12	-1.58
CYTIP	209606_at	mRNA	1.52e-07	2.15e-08	-1.58
GSTZ1	209531_at	mRNA	7.08e-19	1.75e-20	-1.57
RNF125	207735_at	mRNA	2.2e-15	9.16e-17	-1.56
PROZ	208034_s_at	mRNA	8.78e-15	3.96e-16	-1.56
LYVE1	219059_s_at	mRNA	8.56e-13	5.26e-14	-1.56
PZP	207330_at	mRNA	4.88e-21	8.78e-23	-1.55
SLC25A15	222705_s_at	mRNA	1.51e-16	5.27e-18	-1.55
ANGPTL6	223967_at	mRNA	1.24e-37	1.2e-40	-1.54
DNASE1L3	1561336_at	mRNA	5.94e-24	6.32e-26	-1.54
MS4A6A	219666_at	mRNA	8.32e-12	5.93e-13	-1.54
FAM149A	214889_at	mRNA	1.78e-24	1.71e-26	-1.53
PAMR1	213661_at	mRNA	9.8e-22	1.56e-23	-1.53
ACADSB	205355_at	mRNA	5.14e-16	1.97e-17	-1.53
CCL19	210072_at	mRNA	8.4e-07	1.35e-07	-1.53
ETFDH	205530_at	mRNA	2.11e-27	1.26e-29	-1.52
IER2	202081_at	mRNA	1.65e-22	2.31e-24	-1.5
DEPDC7	228293_at	mRNA	2.05e-17	6.24e-19	-1.5
TCTEX1D1	1553635_s_at	mRNA	2.85e-20	5.66e-22	-1.49
SULF2	224724_at	mRNA	8.74e-12	6.25e-13	-1.49
PLSCR4	218901_at	mRNA	2.61e-30	9.41e-33	-1.48
CTH	206085_s_at	mRNA	4.78e-15	2.09e-16	-1.48
CYP3A4	205998_x_at	mRNA	4.09e-12	2.79e-13	-1.48
KANK4	229125_at	mRNA	2.83e-09	3e-10	-1.48
P2RY13	220005_at	mRNA	9.9e-09	1.15e-09	-1.48
FGA	205649_s_at	mRNA	1.23e-16	4.23e-18	-1.47
EPB41L4B	220161_s_at	mRNA	1.11e-16	3.79e-18	-1.46
PHLDA1	217996_at	mRNA	1.51e-11	1.12e-12	-1.46
AADAT	223593_at	mRNA	3.96e-36	4.92e-39	-1.45
LIFR	205876_at	mRNA	1.37e-19	2.99e-21	-1.45
IYD	231070_at	mRNA	5.7e-20	1.18e-21	-1.44
CCL2	216598_s_at	mRNA	2.76e-08	3.45e-09	-1.44
ADAMTSL2	206629_at	mRNA	2.79e-21	4.81e-23	-1.43
FCGR2B	210889_s_at	mRNA	6.04e-12	4.2e-13	-1.42
CCL5	1405_i_at	mRNA	6.17e-10	5.89e-11	-1.42
IL1RL1	207526_s_at	mRNA	3.09e-11	2.41e-12	-1.41
ARRDC4	225283_at	mRNA	1.35e-10	1.17e-11	-1.41
DHRS1	213279_at	mRNA	1.13e-17	3.32e-19	-1.39
EPHX2	209368_at	mRNA	2.85e-15	1.21e-16	-1.39
AKR7A3	206469_x_at	mRNA	2.36e-15	9.86e-17	-1.37
SHBG	215689_s_at	mRNA	9.93e-20	2.13e-21	-1.36
S100A8	202917_s_at	mRNA	3.08e-06	5.52e-07	-1.36
HAO1	220224_at	mRNA	7.07e-14	3.63e-15	-1.35
IGFALS	215712_s_at	mRNA	2.69e-30	9.75e-33	-1.34
SKAP1	205790_at	mRNA	3.39e-31	1e-33	-1.33
BMPER	241986_at	mRNA	2.3e-25	1.88e-27	-1.33
ADRA1A	211489_at	mRNA	4.36e-22	6.6e-24	-1.33
PON1	206344_at	mRNA	2.02e-10	1.79e-11	-1.33
GSTA1	203924_at	mRNA	3.4e-09	3.65e-10	-1.33
BDH2	218285_s_at	mRNA	1.41e-24	1.33e-26	-1.31
ANKRD55	220112_at	mRNA	2.68e-26	1.89e-28	-1.3
CDA	205627_at	mRNA	2.75e-23	3.36e-25	-1.3
ITIH4	206287_s_at	mRNA	3.73e-18	1.02e-19	-1.3
ALDH8A1	220148_at	mRNA	4.19e-16	1.59e-17	-1.3
COL14A1	212865_s_at	mRNA	5.43e-08	7.13e-09	-1.3
ANG	205141_at	mRNA	2.48e-09	2.6e-10	-1.29
SLC27A5	219733_s_at	mRNA	5.55e-08	7.3e-09	-1.29
DOCK8	225502_at	mRNA	1.11e-06	1.82e-07	-1.29
DBH	206450_at	mRNA	1.25e-24	1.16e-26	-1.28
SPRYD4	225616_at	mRNA	2.65e-20	5.25e-22	-1.28
C1R	212067_s_at	mRNA	2.25e-14	1.08e-15	-1.28
CCL14	205392_s_at	mRNA	1.85e-14	8.75e-16	-1.27
AGXT2	229229_at	mRNA	1.01e-10	8.53e-12	-1.26
PTH1R	205911_at	mRNA	7.57e-35	1.18e-37	-1.25
VIPR1	205019_s_at	mRNA	2.93e-26	2.09e-28	-1.25
DIRAS3	215506_s_at	mRNA	1.27e-15	5.12e-17	-1.25
PROM1	204304_s_at	mRNA	3.67e-05	7.95e-06	-1.25
C8A	206305_s_at	mRNA	4.9e-18	1.36e-19	-1.24
EGR3	206115_at	mRNA	6.31e-09	7.06e-10	-1.24
TSPYL5	213122_at	mRNA	8.39e-19	2.09e-20	-1.23
GADD45A	203725_at	mRNA	2.96e-16	1.09e-17	-1.23
CYP8B1	232494_at	mRNA	0.000271	7.01e-05	-1.23
SORL1	203509_at	mRNA	2.68e-20	5.32e-22	-1.22
ARMCX3	217858_s_at	mRNA	1.39e-10	1.2e-11	-1.21
HBA1	204018_x_at	mRNA	1.56e-09	1.58e-10	-1.21
LGSN	220393_at	mRNA	4.37e-09	4.77e-10	-1.21
CPS1	204920_at	mRNA	6.53e-06	1.23e-06	-1.21
SLC39A5	1552281_at	mRNA	3.48e-18	9.43e-20	-1.2
CLYBL	238440_at	mRNA	7.19e-11	5.95e-12	-1.2
LIPC	206606_at	mRNA	1.74e-12	1.12e-13	-1.18
C1RL	218983_at	mRNA	5.15e-25	4.43e-27	-1.16
TSPAN12	219274_at	mRNA	4.96e-14	2.5e-15	-1.16
GPT2	224839_s_at	mRNA	8.38e-16	3.29e-17	-1.15
SERPINF2	205075_at	mRNA	1.64e-08	1.96e-09	-1.15
SLC16A4	205234_at	mRNA	3.56e-08	4.54e-09	-1.14
PEG3	209242_at	mRNA	0.000367	9.74e-05	-1.14
ZFP1	226807_at	mRNA	1.78e-13	9.8e-15	-1.13
HOGA1	239093_at	mRNA	8.21e-10	8e-11	-1.13
ADH6	207544_s_at	mRNA	4.43e-07	6.79e-08	-1.12
ABCB4	1570505_at	mRNA	3.99e-05	8.7e-06	-1.12
GCDH	203500_at	mRNA	3.46e-21	6.03e-23	-1.11
NXF3	220110_s_at	mRNA	4.03e-29	1.69e-31	-1.1
NIPAL1	232158_x_at	mRNA	7.48e-25	6.67e-27	-1.1
GJB2	223278_at	mRNA	4.23e-17	1.36e-18	-1.1
REEP6	226597_at	mRNA	2.37e-11	1.82e-12	-1.1
EXOC3L4	230677_at	mRNA	4.17e-17	1.33e-18	-1.09
C2orf40	223623_at	mRNA	4.09e-10	3.8e-11	-1.09
GLYAT	206930_at	mRNA	2.43e-06	4.26e-07	-1.09
CP	1558034_s_at	mRNA	2.04e-08	2.49e-09	-1.08
DPYS	206065_s_at	mRNA	2.92e-08	3.67e-09	-1.08
PER1	202861_at	mRNA	1.61e-12	1.03e-13	-1.06
OTC	207200_at	mRNA	1.99e-05	4.1e-06	-1.05
SULT2A1	206292_s_at	mRNA	0.000193	4.84e-05	-1.05
CUX2	1566528_at	mRNA	0.000987	0.000289	-1.03
ACSM3	205942_s_at	mRNA	2.82e-10	2.56e-11	-1.02
EDNRB	204271_s_at	mRNA	5.54e-08	7.28e-09	-1.01
HMGB2	208808_s_at	mRNA	6.53e-14	3.34e-15	1.01
ANLN	1552619_a_at	mRNA	4.94e-22	7.55e-24	1.03
ACSM1	215432_at	mRNA	0.000105	2.49e-05	1.03
CENPE	205046_at	mRNA	5.99e-24	6.4e-26	1.04
UBE2T	223229_at	mRNA	5.06e-18	1.41e-19	1.05
MSH2	209421_at	mRNA	7.21e-09	8.16e-10	1.07
KPNA2	201088_at	mRNA	1.48e-21	2.43e-23	1.08
COL4A1	211980_at	mRNA	1.27e-07	1.77e-08	1.08
STK39	202786_at	mRNA	3.69e-06	6.69e-07	1.09
OIP5	213599_at	mRNA	6.15e-17	2.02e-18	1.1
SLC26A2	205097_at	mRNA	1.33e-11	9.8e-13	1.1
EBF1	227646_at	mRNA	2.96e-09	3.15e-10	1.1
MCM6	201930_at	mRNA	1.19e-16	4.06e-18	1.11
TPR	1557227_s_at	mRNA	7.33e-12	5.17e-13	1.11
BAG2	209406_at	mRNA	7.43e-08	9.99e-09	1.11
HRCT1	235496_at	mRNA	8.5e-18	2.47e-19	1.12
CDKN3	1555758_a_at	mRNA	1.04e-20	1.95e-22	1.13
ZBTB41	226962_at	mRNA	1.48e-11	1.1e-12	1.14
S100P	204351_at	mRNA	7.41e-06	1.41e-06	1.14
TBCE	203714_s_at	mRNA	4.82e-29	2.08e-31	1.15
XK	206698_at	mRNA	1.86e-06	3.19e-07	1.15
PRIM1	205053_at	mRNA	7.15e-15	3.19e-16	1.16
TOX3	214774_x_at	mRNA	1.37e-12	8.65e-14	1.16
DEPDC1B	226980_at	mRNA	4.94e-11	3.98e-12	1.16
PODXL	201578_at	mRNA	2.94e-13	1.68e-14	1.18
SPC25	209891_at	mRNA	1.45e-19	3.19e-21	1.19
SQLE	209218_at	mRNA	1.12e-05	2.2e-06	1.2
MCM3	201555_at	mRNA	1.55e-19	3.41e-21	1.21
C12orf75	225105_at	mRNA	9.07e-06	1.75e-06	1.21
FABP5	202345_s_at	mRNA	1.08e-05	2.12e-06	1.22
HSPB1	201841_s_at	mRNA	3.06e-08	3.86e-09	1.24
TCF19	223274_at	mRNA	2e-25	1.62e-27	1.25
TIGD1	1553099_at	mRNA	3.92e-27	2.44e-29	1.28
SMYD3	218788_s_at	mRNA	9.97e-16	3.97e-17	1.29
MMP12	204580_at	mRNA	7.84e-07	1.26e-07	1.3
FEN1	204767_s_at	mRNA	2.42e-20	4.78e-22	1.31
TOMM40L	226059_at	mRNA	5.02e-28	2.63e-30	1.32
RFC4	204023_at	mRNA	4.08e-19	9.65e-21	1.33
PPARA	1556064_at	mRNA	1.1e-25	8.69e-28	1.34
SHCBP1	219493_at	mRNA	7.93e-20	1.67e-21	1.35
UBE2C	202954_at	mRNA	1.16e-28	5.39e-31	1.38
RRAGD	221523_s_at	mRNA	2.03e-10	1.8e-11	1.38
HELLS	220085_at	mRNA	1.04e-15	4.14e-17	1.39
FANCI	213007_at	mRNA	2.27e-19	5.18e-21	1.4
TPX2	210052_s_at	mRNA	9.17e-20	1.95e-21	1.41
KIF23	204709_s_at	mRNA	3.65e-16	1.37e-17	1.41
SLC38A6	214830_at	mRNA	1.83e-16	6.46e-18	1.42
GTSF1	227711_at	mRNA	2.63e-07	3.88e-08	1.45
MCM8	224320_s_at	mRNA	1.1e-29	4.31e-32	1.47
CEP55	218542_at	mRNA	1.07e-16	3.65e-18	1.47
RBP7	238066_at	mRNA	1.33e-11	9.8e-13	1.48
CTHRC1	225681_at	mRNA	1.01e-05	1.98e-06	1.5
CDKN2A	207039_at	mRNA	8.52e-26	6.64e-28	1.51
TKT	208699_x_at	mRNA	2.49e-13	1.41e-14	1.52
KIF18B	222039_at	mRNA	1.3e-27	7.28e-30	1.53
UHRF1	225655_at	mRNA	1.78e-16	6.26e-18	1.53
TRIM71	231310_at	mRNA	2.46e-18	6.52e-20	1.57
CCL20	205476_at	mRNA	1.66e-05	3.38e-06	1.57
CLGN	205830_at	mRNA	1.28e-06	2.13e-07	1.58
KIF2C	209408_at	mRNA	7.64e-28	4.11e-30	1.59
THBS4	204776_at	mRNA	1.28e-14	5.9e-16	1.59
DLG5	201681_s_at	mRNA	3.45e-31	1.03e-33	1.6
STXBP6	220994_s_at	mRNA	4.44e-29	1.89e-31	1.6
EZH2	203358_s_at	mRNA	2.49e-26	1.73e-28	1.61
ESM1	208394_x_at	mRNA	4.03e-25	3.43e-27	1.61
STIL	205339_at	mRNA	1.84e-29	7.47e-32	1.62
MTFR2	228069_at	mRNA	2.61e-25	2.16e-27	1.63
C1orf43	1555225_at	mRNA	2e-30	6.88e-33	1.68
APOBEC3A	206632_s_at	mRNA	1.05e-23	1.19e-25	1.68
NQO1	201467_s_at	mRNA	9.54e-08	1.31e-08	1.69
SRXN1	225252_at	mRNA	3.8e-17	1.21e-18	1.7
TRIP13	204033_at	mRNA	7.63e-27	4.98e-29	1.71
C1orf112	220840_s_at	mRNA	4.95e-26	3.69e-28	1.71
CCNE2	205034_at	mRNA	5.63e-24	5.93e-26	1.71
FLVCR1	222906_at	mRNA	6.25e-23	8.13e-25	1.71
PTTG1	203554_x_at	mRNA	1.71e-28	8.25e-31	1.74
AURKA	204092_s_at	mRNA	2.72e-23	3.32e-25	1.74
CDC7	204510_at	mRNA	3.29e-20	6.61e-22	1.74
CENPW	226936_at	mRNA	1.55e-38	1.33e-41	1.77
BUB1	209642_at	mRNA	2.81e-25	2.33e-27	1.77
SERPINI1	205352_at	mRNA	6.66e-20	1.4e-21	1.77
LYZ	1555745_a_at	mRNA	2.48e-09	2.61e-10	1.77
TTC9	213172_at	mRNA	1.09e-20	2.06e-22	1.78
TXNRD1	201266_at	mRNA	4.56e-20	9.31e-22	1.8
FOXM1	202580_x_at	mRNA	8.29e-27	5.46e-29	1.81
DCAF4L2	1553197_at	mRNA	8.57e-17	2.86e-18	1.84
AKR1C3	209160_at	mRNA	8.7e-33	1.92e-35	1.89
ZWINT	204026_s_at	mRNA	4.09e-23	5.12e-25	1.89
HOXA13	231786_at	mRNA	3.57e-22	5.33e-24	1.89
TTC39A	210652_s_at	mRNA	5.19e-16	1.99e-17	1.9
E2F8	219990_at	mRNA	1.28e-27	7.15e-30	1.91
CENPA	204962_s_at	mRNA	2.21e-27	1.33e-29	1.91
CENPK	222848_at	mRNA	6.38e-26	4.85e-28	1.93
TP53I3	210609_s_at	mRNA	1.44e-20	2.76e-22	1.95
KIF4A	218355_at	mRNA	7.43e-32	1.89e-34	1.98
RAD51AP1	204146_at	mRNA	5.82e-27	3.74e-29	1.99
COL15A1	203477_at	mRNA	3.53e-16	1.32e-17	2.01
SPARCL1	200795_at	mRNA	3.12e-10	2.86e-11	2.01
ITGA6	201656_at	mRNA	9.26e-34	1.73e-36	2.02
NUSAP1	218039_at	mRNA	5.43e-29	2.38e-31	2.03
CCNB2	202705_at	mRNA	7.42e-31	2.33e-33	2.04
CDKN2C	204159_at	mRNA	1.42e-25	1.12e-27	2.05
CENPU	218883_s_at	mRNA	2.08e-26	1.44e-28	2.08
NEK2	204641_at	mRNA	1.41e-30	4.68e-33	2.1
KIF11	204444_at	mRNA	6.38e-28	3.41e-30	2.11
DNAJC6	204720_s_at	mRNA	4.57e-34	7.95e-37	2.22
ACSL4	202422_s_at	mRNA	4.36e-13	2.57e-14	2.22
DLGAP5	203764_at	mRNA	1.3e-27	7.3e-30	2.23
GREB1	205862_at	mRNA	8.85e-12	6.34e-13	2.24
PAGE4	205564_at	mRNA	2.68e-10	2.42e-11	2.24
GINS1	206102_at	mRNA	2.44e-30	8.6e-33	2.26
TTK	204822_at	mRNA	1.62e-27	9.41e-30	2.31
CDC20	202870_s_at	mRNA	1.38e-26	9.24e-29	2.32
NCAPG	218662_s_at	mRNA	9.9e-33	2.21e-35	2.37
SLC22A4	205896_at	mRNA	9.71e-20	2.08e-21	2.37
MAGEA12	210467_x_at	mRNA	2.09e-13	1.16e-14	2.37
E2F7	228033_at	mRNA	5.84e-34	1.03e-36	2.39
NUF2	223381_at	mRNA	9.02e-30	3.45e-32	2.39
UBD	205890_s_at	mRNA	1.79e-16	6.32e-18	2.39
ECT2	219787_s_at	mRNA	1.11e-24	1.02e-26	2.4
DTL	218585_s_at	mRNA	6.77e-27	4.4e-29	2.42
RRM2	201890_at	mRNA	5.12e-29	2.23e-31	2.44
KIF20A	218755_at	mRNA	1.83e-34	2.95e-37	2.46
PRC1	218009_s_at	mRNA	2.22e-31	6.37e-34	2.49
EML6	229656_s_at	mRNA	1.93e-23	2.29e-25	2.49
FAM83D	225687_at	mRNA	2.55e-36	2.94e-39	2.52
GPR158	232195_at	mRNA	5.26e-32	1.3e-34	2.52
ISX	232707_at	mRNA	9.1e-23	1.22e-24	2.54
TDGF1	206286_s_at	mRNA	6.86e-18	1.95e-19	2.54
FAM72A	225834_at	mRNA	1.85e-28	8.96e-31	2.55
RUNX1	1563591_at	mRNA	6.01e-18	1.69e-19	2.55
CCNB1	214710_s_at	mRNA	2.09e-36	2.33e-39	2.58
CD109	226545_at	mRNA	6.5e-26	4.95e-28	2.59
RACGAP1	222077_s_at	mRNA	3.68e-40	2.63e-43	2.62
PBK	219148_at	mRNA	4.4e-34	7.57e-37	2.63
BUB1B	203755_at	mRNA	6.62e-33	1.39e-35	2.66
FAM133A	231131_at	mRNA	2.67e-29	1.09e-31	2.66
MAGEA1	207325_x_at	mRNA	6.77e-19	1.66e-20	2.66
ALDH3A1	205623_at	mRNA	1.27e-12	7.97e-14	2.66
COX7B2	231265_at	mRNA	2.22e-21	3.73e-23	2.68
CDK1	203213_at	mRNA	3.1e-36	3.68e-39	2.7
FGF13	205110_s_at	mRNA	2.74e-18	7.31e-20	2.78
CAP2	212551_at	mRNA	3.94e-41	2.09e-44	2.84
MELK	204825_at	mRNA	4.53e-36	5.8e-39	2.84
NDC80	204162_at	mRNA	1.01e-37	9.59e-41	2.85
SMPX	219772_s_at	mRNA	4.19e-31	1.26e-33	2.9
MAGEA3	209942_x_at	mRNA	3.6e-15	1.55e-16	2.94
RBM24	235004_at	mRNA	2.87e-37	2.99e-40	2.99
SPP1	209875_s_at	mRNA	2.18e-13	1.21e-14	3.04
ASPM	219918_s_at	mRNA	7.54e-41	4.28e-44	3.06
LCN2	212531_at	mRNA	1.65e-22	2.32e-24	3.08
SSX1	206626_x_at	mRNA	8.51e-19	2.12e-20	3.09
CTNNA2	205373_at	mRNA	3.65e-17	1.16e-18	3.11
HMMR	207165_at	mRNA	2.57e-49	2.35e-53	3.22
ZIC2	223642_at	mRNA	3.53e-30	1.3e-32	3.22
ROBO1	213194_at	mRNA	2.26e-34	3.71e-37	3.23
GPC3	209220_at	mRNA	6.36e-23	8.29e-25	3.35
SULT1C2	205342_s_at	mRNA	4.44e-40	3.25e-43	3.47
AKR1B10	206561_s_at	mRNA	5.79e-12	4.02e-13	3.5
NRCAM	204105_s_at	mRNA	2.54e-25	2.09e-27	3.68
DKK1	204602_at	mRNA	5.57e-19	1.35e-20	3.7
TOP2A	201291_s_at	mRNA	5.84e-43	2.03e-46	3.74
SPINK1	206239_s_at	mRNA	3.67e-16	1.38e-17	3.81
REG3A	205815_at	mRNA	2e-14	9.49e-16	5.31
FDR, false discovery rate; FC, fold change; lncRNA, long non-coding RNA.

## Sheet: GSE121248-common-DERs
Table SIIB. Differentially expressed RNAs in GSE121248 overlapping with GSE55092.
Symbol	ID	Type	FDR	P-value	logFC
LINC01093	1559573_at	lncRNA	2.23e-21	1.23e-24	-4.17843
LINC00844	230577_at	lncRNA	7.06e-06	8.82e-07	-2.34971
H19	224646_x_at	lncRNA	4.44e-08	2.6e-09	-2.26705
HAND2-AS1	219791_s_at	lncRNA	1.15e-16	2.04e-19	-1.44566
DNM3OS	232090_at	lncRNA	7.45e-06	9.37e-07	-1.39728
DHRS4-AS1	227446_s_at	lncRNA	1.84e-07	1.34e-08	-1.39257
MAGI2-AS3	227554_at	lncRNA	2.36e-09	8.51e-11	-1.39166
LINC00261	228004_at	lncRNA	3.1e-05	4.76e-06	-1.3827
LINC01018	1559033_at	lncRNA	0.00514	0.00176	-1.2671
SOCS2-AS1	1559315_s_at	lncRNA	2.91e-09	1.09e-10	-1.22705
DBH-AS1	230488_s_at	lncRNA	0.000451	0.000104	-1.19628
PWAR6	226587_at	lncRNA	0.00709	0.00256	-1.18083
LINC01146	1559363_at	lncRNA	2.44e-07	1.85e-08	-1.12422
HHIP-AS1	236632_at	lncRNA	8.11e-14	4.77e-16	-1.10293
MIR22HG	214696_at	lncRNA	9.3e-10	2.84e-11	-1.04367
ADAMTS9-AS2	1556364_at	lncRNA	4.93e-06	5.83e-07	-1.03429
FLVCR1-AS1	235126_at	lncRNA	0.000194	3.95e-05	1.00935
ITPR1-AS1	239764_at	lncRNA	1.28e-05	1.74e-06	1.02071
LINC01004	235217_at	lncRNA	0.000339	7.52e-05	1.03216
PCAT6	231233_at	lncRNA	5.3e-07	4.48e-08	1.05263
RUSC1-AS1	1552862_at	lncRNA	1.05e-11	1.46e-13	1.05438
DSCR8	241224_x_at	lncRNA	0.0181	0.0076	1.08205
LINC00528	1556072_at	lncRNA	3.67e-09	1.44e-10	1.15914
TAPT1-AS1	1553145_at	lncRNA	1.22e-06	1.17e-07	1.17031
LINC00205	226995_at	lncRNA	1.53e-09	5.1e-11	1.20629
DNAJC3-AS1	240574_at	lncRNA	2.66e-07	2.03e-08	1.28826
LINC01003	235174_s_at	lncRNA	1.3e-07	8.92e-09	1.32414
LINC00622	1558404_at	lncRNA	9.3e-07	8.52e-08	1.32884
ZEB1-AS1	229090_at	lncRNA	9.75e-12	1.34e-13	1.34449
ST8SIA6-AS1	242350_s_at	lncRNA	1.57e-08	7.8e-10	1.6188
HAMP	220491_at	mRNA	3.03e-15	9.46e-18	-4.16027
KCNN2	220116_at	mRNA	4.13e-24	9.06e-28	-3.99084
CXCL14	218002_s_at	mRNA	4.97e-26	6.62e-30	-3.80394
CNDP1	223699_at	mRNA	1.25e-19	1.05e-22	-3.75233
FCN2	207804_s_at	mRNA	6.81e-23	1.99e-26	-3.63646
CYP1A2	207608_x_at	mRNA	1.13e-16	1.97e-19	-3.35312
FCN3	205866_at	mRNA	4.21e-20	3.23e-23	-3.34198
IDO2	1568638_a_at	mRNA	1e-18	1.16e-21	-3.32168
BBOX1	205363_at	mRNA	3.67e-13	2.94e-15	-3.29662
OIT3	230478_at	mRNA	4.44e-23	1.14e-26	-3.22952
CLEC4G	1559065_a_at	mRNA	1.55e-22	5.94e-26	-3.16217
CLEC1B	220496_at	mRNA	4.97e-26	7.27e-30	-3.13588
CLRN3	229777_at	mRNA	4.79e-14	2.55e-16	-3.12481
CRHBP	205984_at	mRNA	2.16e-21	1.14e-24	-2.99937
TTC36	237350_at	mRNA	2.02e-17	3.11e-20	-2.95772
SLCO1B3	206354_at	mRNA	1.39e-08	6.77e-10	-2.92722
CLEC4M	207995_s_at	mRNA	2.51e-24	5.06e-28	-2.927
C7	202992_at	mRNA	3.52e-11	6.13e-13	-2.88151
MT1M	217546_at	mRNA	9.94e-09	4.61e-10	-2.83498
HGFAC	207027_at	mRNA	1.54e-15	4.12e-18	-2.82725
SRPX	204955_at	mRNA	1.13e-15	2.82e-18	-2.80819
C9	206727_at	mRNA	1.47e-06	1.45e-07	-2.78642
CYP26A1	206424_at	mRNA	1.9e-21	9.73e-25	-2.72121
HGF	209960_at	mRNA	7.89e-15	2.97e-17	-2.71091
APOF	207262_at	mRNA	4.12e-12	4.97e-14	-2.68501
IGF2	202409_at	mRNA	9.52e-07	8.77e-08	-2.68301
GPM6A	209469_at	mRNA	1.63e-18	2e-21	-2.68092
HAO2	220801_s_at	mRNA	1.39e-10	3.08e-12	-2.62003
AKR1D1	207102_at	mRNA	7.38e-08	4.66e-09	-2.55776
SLC22A1	207201_s_at	mRNA	4.24e-08	2.46e-09	-2.52915
LCAT	204428_s_at	mRNA	9.9e-20	7.97e-23	-2.51929
DCN	201893_x_at	mRNA	5.1e-10	1.39e-11	-2.51224
NAT2	206797_at	mRNA	7.44e-15	2.78e-17	-2.48134
CDHR2	220186_s_at	mRNA	1.4e-24	2.57e-28	-2.44651
FOSB	202768_at	mRNA	6.13e-13	5.31e-15	-2.42948
CNTN3	229831_at	mRNA	1.43e-07	9.96e-09	-2.41603
FREM2	230964_at	mRNA	5.58e-10	1.55e-11	-2.36908
LPA	207584_at	mRNA	2.03e-12	2.15e-14	-2.36806
IGF1	209540_at	mRNA	2.46e-11	4.03e-13	-2.34875
BCO2	232449_at	mRNA	4.06e-13	3.31e-15	-2.33306
CYP2A6	1494_f_at	mRNA	7.49e-08	4.73e-09	-2.32207
MFSD2A	225316_at	mRNA	6.84e-12	8.99e-14	-2.3163
GBA3	219954_s_at	mRNA	2.84e-10	7.08e-12	-2.30908
GYS2	214621_at	mRNA	3.43e-07	2.73e-08	-2.29107
GHR	205498_at	mRNA	1.48e-09	4.91e-11	-2.28211
BCHE	205433_at	mRNA	1.72e-07	1.23e-08	-2.27529
ESR1	205225_at	mRNA	1.04e-12	9.95e-15	-2.27525
KANK4	229125_at	mRNA	1.88e-14	8.89e-17	-2.23079
EGR1	201693_s_at	mRNA	1.26e-13	7.86e-16	-2.2255
CYP2B6	206754_s_at	mRNA	9.99e-08	6.59e-09	-2.19955
CXCL12	203666_at	mRNA	2.27e-16	4.49e-19	-2.19732
ZGPAT	221848_at	mRNA	2.27e-22	9.97e-26	-2.19542
FOS	209189_at	mRNA	4.22e-12	5.11e-14	-2.19192
ALDOB	204704_s_at	mRNA	8.32e-07	7.49e-08	-2.18759
SLC25A47	237765_at	mRNA	1.17e-15	2.95e-18	-2.17993
ENO3	204483_at	mRNA	4.64e-15	1.59e-17	-2.17973
PGLYRP2	242817_at	mRNA	1.58e-09	5.33e-11	-2.162
ZG16	214142_at	mRNA	1.81e-14	8.44e-17	-2.12075
KMO	205306_x_at	mRNA	1.06e-12	1.03e-14	-2.09442
IGFBP3	210095_s_at	mRNA	1.61e-16	3.01e-19	-2.07559
PLAC8	219014_at	mRNA	1.17e-17	1.72e-20	-2.06506
CD5L	206680_at	mRNA	2.64e-14	1.3e-16	-2.05476
IGFALS	215712_s_at	mRNA	1.05e-26	5.75e-31	-2.04757
ANK3	206385_s_at	mRNA	1.19e-09	3.81e-11	-2.02851
MT1F	210524_x_at	mRNA	7.58e-11	1.53e-12	-2.0242
SRD5A2	206938_at	mRNA	1.84e-14	8.64e-17	-2.01526
LUM	201744_s_at	mRNA	0.000219	4.53e-05	-1.99215
OLFML3	218162_at	mRNA	3.03e-15	9.42e-18	-1.98196
MBL2	207256_at	mRNA	1.48e-06	1.46e-07	-1.95411
RDH16	206753_at	mRNA	4.39e-08	2.56e-09	-1.94733
FCGR2B	210889_s_at	mRNA	1.38e-11	2.02e-13	-1.94173
NNMT	202237_at	mRNA	2.08e-08	1.08e-09	-1.93458
RSPO3	228186_s_at	mRNA	6.29e-19	6.67e-22	-1.93025
ASPA	206030_at	mRNA	8.38e-13	7.65e-15	-1.92275
MT1G	204745_x_at	mRNA	5.63e-10	1.57e-11	-1.92144
MOGAT2	232428_at	mRNA	2.88e-12	3.28e-14	-1.91487
CETP	206210_s_at	mRNA	1.22e-15	3.16e-18	-1.90855
HAL	206643_at	mRNA	4.39e-05	7.11e-06	-1.9026
ADRA1A	211489_at	mRNA	1.49e-11	2.2e-13	-1.87677
KDM8	220070_at	mRNA	5.37e-21	3.63e-24	-1.87659
IL13RA2	206172_at	mRNA	5.41e-10	1.49e-11	-1.87582
ID1	208937_s_at	mRNA	8e-12	1.08e-13	-1.8647
ADH4	223781_x_at	mRNA	8.11e-09	3.66e-10	-1.86044
PCDH9	219737_s_at	mRNA	5.75e-13	4.96e-15	-1.85631
DIRAS3	215506_s_at	mRNA	1.5e-13	9.76e-16	-1.856
ATF5	204998_s_at	mRNA	1.61e-09	5.46e-11	-1.8471
AFM	206840_at	mRNA	4.29e-07	3.53e-08	-1.84522
FOLH1	205860_x_at	mRNA	2.24e-11	3.63e-13	-1.83704
RND3	212724_at	mRNA	4.41e-15	1.46e-17	-1.8326
SLC3A1	205799_s_at	mRNA	1.07e-09	3.37e-11	-1.83085
FBP1	209696_at	mRNA	8.04e-10	2.4e-11	-1.80897
CCBE1	229641_at	mRNA	5.64e-19	5.68e-22	-1.80073
LECT2	207409_at	mRNA	4.58e-06	5.35e-07	-1.79137
KBTBD11	204301_at	mRNA	3.96e-12	4.76e-14	-1.78973
GSTZ1	209531_at	mRNA	4.73e-14	2.5e-16	-1.77737
SPATA18	229331_at	mRNA	1.16e-11	1.63e-13	-1.77181
VNN1	1558549_s_at	mRNA	1.26e-07	8.59e-09	-1.77036
ANXA10	210143_at	mRNA	1.3e-08	6.29e-10	-1.76295
PRG4	206007_at	mRNA	3.02e-07	2.35e-08	-1.75956
MRC1	204438_at	mRNA	1.79e-10	4.17e-12	-1.75674
CYP2C9	214421_x_at	mRNA	2.23e-07	1.66e-08	-1.75438
NPY1R	205440_s_at	mRNA	2.05e-14	9.82e-17	-1.74887
HOGA1	239093_at	mRNA	1.61e-11	2.4e-13	-1.74538
CYP2C19	216058_s_at	mRNA	6.46e-11	1.26e-12	-1.72843
SLC16A4	205234_at	mRNA	1.41e-09	4.61e-11	-1.72294
FXYD1	205384_at	mRNA	2.21e-10	5.28e-12	-1.71463
CXCL2	1569203_at	mRNA	5.5e-12	6.94e-14	-1.71411
HPD	206024_at	mRNA	0.000969	0.000253	-1.70654
SPP2	214478_at	mRNA	3.46e-06	3.88e-07	-1.70587
AADAT	223593_at	mRNA	4.26e-14	2.17e-16	-1.70342
STAB2	220114_s_at	mRNA	9.24e-22	4.56e-25	-1.70222
GREM2	220794_at	mRNA	3.89e-09	1.55e-10	-1.69437
MARCO	205819_at	mRNA	6.84e-14	3.9e-16	-1.68927
OAT	201599_at	mRNA	3.81e-08	2.17e-09	-1.68807
PROM1	204304_s_at	mRNA	3.24e-09	1.23e-10	-1.68085
KLKB1	206541_at	mRNA	3.7e-11	6.53e-13	-1.68059
SAA4	207096_at	mRNA	1.6e-06	1.59e-07	-1.67889
CYP2C8	208147_s_at	mRNA	0.000117	2.2e-05	-1.67796
CYP3A4	205998_x_at	mRNA	5.64e-11	1.08e-12	-1.67279
ECM1	209365_s_at	mRNA	4.97e-24	1.18e-27	-1.66555
CXCL6	206336_at	mRNA	0.0001	1.83e-05	-1.65851
GLYATL1	227695_at	mRNA	1.27e-11	1.83e-13	-1.65618
MT1H	206461_x_at	mRNA	4.7e-09	1.93e-10	-1.65083
ACOT12	238160_at	mRNA	1.52e-05	2.12e-06	-1.64846
RCAN1	208370_s_at	mRNA	3.96e-15	1.3e-17	-1.64623
ANGPTL6	223967_at	mRNA	1.82e-26	1.33e-30	-1.64605
CLDN10	205328_at	mRNA	1.04e-07	6.9e-09	-1.64395
TMEM45A	219410_at	mRNA	1.99e-08	1.02e-09	-1.63162
TBX15	230438_at	mRNA	7.9e-12	1.06e-13	-1.63075
HPGD	203913_s_at	mRNA	0.000487	0.000114	-1.62719
CFP	206380_s_at	mRNA	7.27e-18	9.97e-21	-1.62267
CYP2E1	1431_at	mRNA	0.0007	0.000173	-1.61203
KAZN	213478_at	mRNA	1.62e-14	7.41e-17	-1.59913
C6	210168_at	mRNA	5.17e-06	6.16e-07	-1.58752
SULF2	224724_at	mRNA	1.66e-10	3.81e-12	-1.58563
CYP39A1	1553977_a_at	mRNA	2.07e-12	2.2e-14	-1.58247
CYP2C18	208126_s_at	mRNA	1.05e-07	6.96e-09	-1.5737
ETNPPL	221008_s_at	mRNA	8.76e-05	1.57e-05	-1.571
MT1E	212859_x_at	mRNA	2.62e-08	1.41e-09	-1.56705
OGDHL	219277_s_at	mRNA	9.47e-08	6.17e-09	-1.56628
GLYAT	206930_at	mRNA	3.51e-05	5.5e-06	-1.56236
CCL2	216598_s_at	mRNA	2.76e-07	2.12e-08	-1.55742
LHX2	206140_at	mRNA	1.58e-10	3.57e-12	-1.55411
PZP	207330_at	mRNA	2.64e-16	5.5e-19	-1.55353
GNMT	210328_at	mRNA	3.89e-05	6.2e-06	-1.55112
ALDH8A1	220148_at	mRNA	1.12e-06	1.06e-07	-1.55095
GCH1	204224_s_at	mRNA	3.81e-11	6.78e-13	-1.54715
TDO2	205943_at	mRNA	8.8e-07	7.99e-08	-1.54569
CFHR3	207874_s_at	mRNA	8.26e-05	1.47e-05	-1.53598
ACSM3	205942_s_at	mRNA	2.02e-11	3.17e-13	-1.53279
PROZ	208034_s_at	mRNA	3.52e-12	4.13e-14	-1.53033
ASS1	207076_s_at	mRNA	9.38e-15	3.77e-17	-1.52796
F9	207218_at	mRNA	0.000145	2.8e-05	-1.5253
CFTR	205043_at	mRNA	4.67e-07	3.88e-08	-1.52484
ID4	209291_at	mRNA	1.07e-06	1.01e-07	-1.52068
LYVE1	219059_s_at	mRNA	3.07e-15	9.65e-18	-1.52047
SOCS2	203372_s_at	mRNA	4.58e-08	2.7e-09	-1.52005
C8A	206305_s_at	mRNA	1.72e-07	1.23e-08	-1.50905
ACADL	206068_s_at	mRNA	3.34e-07	2.63e-08	-1.50903
TCTEX1D1	1553635_s_at	mRNA	9e-18	1.3e-20	-1.49881
PLCXD3	230081_at	mRNA	1.6e-08	7.97e-10	-1.49447
MT1X	204326_x_at	mRNA	2.68e-07	2.05e-08	-1.48924
HBA1	204018_x_at	mRNA	1.6e-09	5.43e-11	-1.48902
PHGDH	201397_at	mRNA	2.06e-13	1.44e-15	-1.48881
SERPINA4	213874_at	mRNA	6.16e-08	3.77e-09	-1.4835
CYFIP2	215785_s_at	mRNA	1.84e-09	6.37e-11	-1.47669
CYP8B1	232494_at	mRNA	0.000782	0.000197	-1.47559
SLC10A1	207185_at	mRNA	0.000287	6.23e-05	-1.47328
MAN1C1	214180_at	mRNA	1.99e-13	1.36e-15	-1.47297
RCL1	218544_s_at	mRNA	6.23e-12	7.96e-14	-1.46849
ADH1C	206262_at	mRNA	0.000431	9.91e-05	-1.4645
PCK1	208383_s_at	mRNA	0.000684	0.000169	-1.46276
AGXT2	229229_at	mRNA	3.42e-08	1.91e-09	-1.45771
KCNJ16	219564_at	mRNA	1.34e-08	6.52e-10	-1.45423
BHMT	206119_at	mRNA	4.37e-05	7.06e-06	-1.45351
CSRNP1	225557_at	mRNA	4.76e-18	6.35e-21	-1.44846
FETUB	210521_s_at	mRNA	0.000662	0.000163	-1.44068
BDH2	218285_s_at	mRNA	9.68e-15	3.91e-17	-1.43657
HBB	209116_x_at	mRNA	7.24e-08	4.55e-09	-1.43639
INMT	224061_at	mRNA	5.16e-11	9.69e-13	-1.42946
GRAMD1C	219313_at	mRNA	6.4e-07	5.54e-08	-1.42707
TUBE1	226181_at	mRNA	2.11e-11	3.35e-13	-1.41583
CCL19	210072_at	mRNA	6.79e-06	8.44e-07	-1.41315
PPP1R1A	205478_at	mRNA	6.73e-05	1.16e-05	-1.41136
EPHA2	203499_at	mRNA	1.81e-15	5.07e-18	-1.40875
FAM110C	226863_at	mRNA	7.94e-06	1.01e-06	-1.39849
COLEC11	219873_at	mRNA	8.14e-07	7.31e-08	-1.39818
MASP2	207041_at	mRNA	9.87e-08	6.49e-09	-1.39535
ADH6	207544_s_at	mRNA	4.4e-07	3.62e-08	-1.39521
ADH1A	207820_at	mRNA	0.000104	1.91e-05	-1.38988
AKR7A3	206469_x_at	mRNA	9.46e-11	1.98e-12	-1.38827
LY6E	202145_at	mRNA	7.49e-13	6.7e-15	-1.38574
CYP4A11	1554837_a_at	mRNA	9.98e-13	9.42e-15	-1.37823
SLC25A18	223605_at	mRNA	1.58e-06	1.57e-07	-1.3753
CD1D	205789_at	mRNA	3.02e-08	1.67e-09	-1.37522
FGFR2	203638_s_at	mRNA	0.000329	7.28e-05	-1.36421
EPHX2	209368_at	mRNA	3.37e-09	1.29e-10	-1.36107
PTGIS	208131_s_at	mRNA	3.28e-07	2.58e-08	-1.3602
PHLDA1	217996_at	mRNA	2.12e-07	1.57e-08	-1.35824
OTC	207200_at	mRNA	0.000765	0.000192	-1.3523
FTCD	220604_x_at	mRNA	4.25e-09	1.71e-10	-1.35024
TSLP	235737_at	mRNA	7.06e-06	8.83e-07	-1.34744
VIPR1	205019_s_at	mRNA	1.97e-26	1.81e-30	-1.34089
S100A8	202917_s_at	mRNA	6.14e-05	1.05e-05	-1.34048
SLC13A5	228844_at	mRNA	0.000228	4.74e-05	-1.33554
CYP3A43	207773_x_at	mRNA	6.9e-08	4.3e-09	-1.33322
CTH	206085_s_at	mRNA	3.21e-05	4.97e-06	-1.33231
SLC39A5	1552281_at	mRNA	1.7e-11	2.54e-13	-1.33201
BGN	201261_x_at	mRNA	1.28e-06	1.23e-07	-1.32296
GLDC	204836_at	mRNA	7.94e-09	3.57e-10	-1.32126
CCL14	205392_s_at	mRNA	6.33e-11	1.22e-12	-1.31953
LIFR	205876_at	mRNA	2.84e-19	2.75e-22	-1.31868
FABP1	205892_s_at	mRNA	0.00148	0.000414	-1.31672
IYD	231070_at	mRNA	1.52e-07	1.07e-08	-1.31334
DEPDC7	228293_at	mRNA	2.81e-07	2.17e-08	-1.31087
APOA5	224243_at	mRNA	2.85e-09	1.07e-10	-1.31042
INHBE	210587_at	mRNA	0.00011	2.03e-05	-1.30786
ADCY1	213245_at	mRNA	2.26e-05	3.32e-06	-1.30258
DPYS	206065_s_at	mRNA	0.0002	4.09e-05	-1.29516
MT1HL1	211456_x_at	mRNA	2.68e-08	1.45e-09	-1.29345
SLC27A5	219733_s_at	mRNA	2.01e-05	2.89e-06	-1.29127
CHST4	220446_s_at	mRNA	2.37e-13	1.72e-15	-1.28713
HABP2	206010_at	mRNA	2.25e-07	1.68e-08	-1.28596
DNASE1L3	1561336_at	mRNA	6.21e-16	1.44e-18	-1.28162
CD69	209795_at	mRNA	5.15e-06	6.14e-07	-1.27898
COLEC10	207420_at	mRNA	2.39e-20	1.79e-23	-1.27829
BMPER	241986_at	mRNA	6.83e-20	5.37e-23	-1.2769
CDC37L1	219343_at	mRNA	7.3e-16	1.74e-18	-1.27509
RNF125	207735_at	mRNA	1.33e-11	1.93e-13	-1.27401
PTH1R	205911_at	mRNA	1.03e-19	8.46e-23	-1.2708
C11orf96	227099_s_at	mRNA	5.54e-06	6.66e-07	-1.26958
CIDEB	221188_s_at	mRNA	4.07e-10	1.08e-11	-1.25569
COL14A1	212865_s_at	mRNA	0.00013	2.48e-05	-1.25242
SHBG	215689_s_at	mRNA	4.5e-15	1.52e-17	-1.25076
FNDC5	226096_at	mRNA	0.000122	2.31e-05	-1.24668
DEFB1	210397_at	mRNA	0.00305	0.000953	-1.24648
GADD45B	207574_s_at	mRNA	7.04e-09	3.11e-10	-1.24586
CPS1	204920_at	mRNA	0.00175	0.000501	-1.24249
CA2	209301_at	mRNA	6.67e-09	2.91e-10	-1.24222
TRIB1	202241_at	mRNA	2.36e-15	6.88e-18	-1.24156
PON1	206344_at	mRNA	1.74e-06	1.75e-07	-1.22809
FEZ1	203562_at	mRNA	5.75e-13	4.93e-15	-1.22438
HAO1	220224_at	mRNA	0.000159	3.13e-05	-1.21835
PIK3C2G	215129_at	mRNA	3.27e-08	1.82e-09	-1.21524
MXRA5	209596_at	mRNA	5.97e-06	7.27e-07	-1.2102
CCL5	1405_i_at	mRNA	2.19e-06	2.28e-07	-1.20877
ZFPM2	219778_at	mRNA	2.73e-08	1.48e-09	-1.20679
FBLN5	203088_at	mRNA	6.95e-08	4.34e-09	-1.20431
MT2A	212185_x_at	mRNA	8.62e-08	5.53e-09	-1.20114
NR4A2	204621_s_at	mRNA	3.18e-06	3.52e-07	-1.20054
CP	1558034_s_at	mRNA	9.51e-06	1.24e-06	-1.19758
C1R	212067_s_at	mRNA	6.1e-08	3.73e-09	-1.19716
ANKRD55	220112_at	mRNA	7.37e-22	3.5e-25	-1.195
CUX2	1566528_at	mRNA	7.57e-06	9.55e-07	-1.19353
PRKAR2B	203680_at	mRNA	5.59e-07	4.77e-08	-1.17959
ASPN	219087_at	mRNA	0.000369	8.27e-05	-1.1794
GPR182	1552440_at	mRNA	1.73e-19	1.52e-22	-1.17789
GABRP	205044_at	mRNA	2.28e-07	1.71e-08	-1.17509
ETFDH	205530_at	mRNA	2.73e-09	1.01e-10	-1.1719
PLIN2	209122_at	mRNA	1.46e-09	4.84e-11	-1.17065
LIPC	206606_at	mRNA	1.78e-07	1.28e-08	-1.16999
TMEM154	238063_at	mRNA	1.19e-06	1.13e-07	-1.16724
EPHA3	206070_s_at	mRNA	0.000214	4.42e-05	-1.16704
CNTN4	229084_at	mRNA	7.11e-09	3.15e-10	-1.16646
SLC27A2	205768_s_at	mRNA	0.000222	4.61e-05	-1.16437
PER1	202861_at	mRNA	7.2e-14	4.13e-16	-1.1592
EHD3	218935_at	mRNA	6.76e-13	5.94e-15	-1.15888
BASP1	202391_at	mRNA	7.53e-07	6.68e-08	-1.15875
RGS2	202388_at	mRNA	0.000158	3.1e-05	-1.15824
HSD17B2	204818_at	mRNA	6.23e-05	1.06e-05	-1.15057
GEM	204472_at	mRNA	8.36e-05	1.49e-05	-1.14995
ZFP1	226807_at	mRNA	4.9e-10	1.33e-11	-1.14461
CDA	205627_at	mRNA	2.25e-06	2.35e-07	-1.14036
CYP4V2	226745_at	mRNA	1.12e-08	5.31e-10	-1.13743
LGSN	220393_at	mRNA	0.00162	0.000459	-1.13676
PANK1	226649_at	mRNA	6.8e-09	2.98e-10	-1.13226
NXF3	220110_s_at	mRNA	2.46e-21	1.44e-24	-1.13069
FAM149A	214889_at	mRNA	2.51e-08	1.34e-09	-1.13059
IL1RL1	207526_s_at	mRNA	1.1e-10	2.36e-12	-1.12905
C8B	206979_at	mRNA	1.96e-05	2.82e-06	-1.12798
A1BG	229819_at	mRNA	0.000258	5.48e-05	-1.12712
IL1RAP	205227_at	mRNA	3.9e-08	2.23e-09	-1.12579
ACADSB	205355_at	mRNA	3.82e-06	4.34e-07	-1.12506
SLCO4C1	222071_s_at	mRNA	8.84e-05	1.59e-05	-1.12065
SERPINA7	206386_at	mRNA	0.00192	0.000556	-1.12058
DMGDH	231790_at	mRNA	0.000257	5.46e-05	-1.11928
ANG	205141_at	mRNA	9.9e-06	1.3e-06	-1.11715
SLC51A	229230_at	mRNA	0.00193	0.000561	-1.1124
UNC93A	214382_at	mRNA	0.000382	8.62e-05	-1.11201
ADAMTSL2	206629_at	mRNA	1.54e-10	3.48e-12	-1.11158
GPT2	224839_s_at	mRNA	1.71e-06	1.72e-07	-1.11002
ADH1B	209612_s_at	mRNA	0.00433	0.00144	-1.1002
ITIH4	206287_s_at	mRNA	9.13e-05	1.65e-05	-1.0961
PAMR1	213661_at	mRNA	1.08e-18	1.3e-21	-1.0955
HPX	210013_at	mRNA	0.000186	3.76e-05	-1.09398
SORL1	203509_at	mRNA	3.01e-07	2.34e-08	-1.09097
ACSL1	201963_at	mRNA	6.24e-07	5.38e-08	-1.09056
IL33	209821_at	mRNA	7.49e-07	6.64e-08	-1.0867
ARRDC4	225283_at	mRNA	8.13e-06	1.04e-06	-1.08612
MS4A6A	219666_at	mRNA	3.62e-10	9.37e-12	-1.08226
C2orf40	223623_at	mRNA	3.23e-09	1.23e-10	-1.07827
EXOC3L4	230677_at	mRNA	1.25e-07	8.51e-09	-1.07354
REEP6	226597_at	mRNA	6.25e-05	1.07e-05	-1.07271
EPB41L4B	220161_s_at	mRNA	3.11e-08	1.72e-09	-1.06631
ARMCX3	217858_s_at	mRNA	5.84e-05	9.86e-06	-1.06551
GSTA1	203924_at	mRNA	0.00472	0.00159	-1.06474
CYTIP	209606_at	mRNA	3.85e-05	6.13e-06	-1.06347
DHRS1	213279_at	mRNA	5.43e-08	3.26e-09	-1.06217
SULT2A1	206292_s_at	mRNA	0.00404	0.00133	-1.0592
IER2	202081_at	mRNA	1.54e-11	2.28e-13	-1.05618
DSEL	232235_at	mRNA	0.000133	2.55e-05	-1.05521
SPRYD4	225616_at	mRNA	1.41e-12	1.4e-14	-1.05445
PLG	1558603_at	mRNA	1.6e-06	1.59e-07	-1.04918
SLC25A15	222705_s_at	mRNA	1.83e-06	1.85e-07	-1.04658
SERPINF2	205075_at	mRNA	1.41e-07	9.79e-09	-1.04323
SLC38A4	1555345_at	mRNA	0.000216	4.47e-05	-1.04252
GCDH	203500_at	mRNA	3.11e-10	7.83e-12	-1.04239
SKAP1	205790_at	mRNA	4.33e-08	2.52e-09	-1.04008
EGR3	206115_at	mRNA	2.3e-05	3.38e-06	-1.03509
PLSCR4	218901_at	mRNA	1.18e-09	3.76e-11	-1.0338
PEG3	209242_at	mRNA	0.0128	0.00509	-1.03114
ARG1	206177_s_at	mRNA	0.00647	0.0023	-1.03063
CYP4F2	206514_s_at	mRNA	7.11e-05	1.23e-05	-1.02762
EDNRB	204271_s_at	mRNA	9.88e-10	3.06e-11	-1.02388
ZFP36	201531_at	mRNA	3.33e-11	5.76e-13	-1.02296
TSPAN12	219274_at	mRNA	2.16e-06	2.24e-07	-1.02265
TEK	206702_at	mRNA	3.45e-09	1.33e-10	-1.02155
TSPYL5	213122_at	mRNA	9.42e-10	2.89e-11	-1.0213
SDS	1555539_at	mRNA	0.00642	0.00228	-1.02088
GJB2	223278_at	mRNA	1.13e-05	1.51e-06	-1.0166
ACMSD	230602_at	mRNA	0.000445	0.000103	-1.01639
DBH	206450_at	mRNA	1.87e-19	1.67e-22	-1.01584
FGA	205649_s_at	mRNA	0.000629	0.000153	-1.01582
SERPINA5	209443_at	mRNA	0.000102	1.86e-05	-1.01446
C1RL	218983_at	mRNA	1.57e-09	5.31e-11	-1.01215
CLYBL	238440_at	mRNA	2.87e-07	2.22e-08	-1.01139
ABCB4	1570505_at	mRNA	0.00167	0.000473	-1.01029
DOCK8	225502_at	mRNA	1.91e-05	2.74e-06	-1.00967
NIPAL1	232158_x_at	mRNA	9.49e-09	4.36e-10	-1.00871
GADD45A	203725_at	mRNA	1.26e-07	8.62e-09	-1.00792
P2RY13	220005_at	mRNA	1.6e-08	7.98e-10	-1.00397
ZBTB41	226962_at	mRNA	8e-11	1.62e-12	1.00426
C12orf75	225105_at	mRNA	0.000312	6.84e-05	1.00897
FEN1	204767_s_at	mRNA	1.54e-10	3.48e-12	1.01744
SLC22A4	205896_at	mRNA	1.41e-06	1.37e-07	1.01759
FAM133A	231131_at	mRNA	7.03e-05	1.22e-05	1.01879
ACSM1	215432_at	mRNA	0.000535	0.000127	1.02688
TDGF1	206286_s_at	mRNA	0.000772	0.000194	1.03445
CENPE	205046_at	mRNA	2.34e-09	8.42e-11	1.04432
RRAGD	221523_s_at	mRNA	1.1e-07	7.35e-09	1.04627
PPARA	1556064_at	mRNA	8.47e-14	5.02e-16	1.04714
TBCE	203714_s_at	mRNA	1.65e-14	7.59e-17	1.05144
TPX2	210052_s_at	mRNA	1.3e-07	8.92e-09	1.05539
OIP5	213599_at	mRNA	4.32e-09	1.75e-10	1.05733
KIF23	204709_s_at	mRNA	2.23e-07	1.66e-08	1.05794
SRXN1	225252_at	mRNA	1.9e-07	1.39e-08	1.0586
SHCBP1	219493_at	mRNA	1.11e-07	7.41e-09	1.06256
TCF19	223274_at	mRNA	3.3e-11	5.7e-13	1.06503
TTC39A	210652_s_at	mRNA	1.21e-05	1.64e-06	1.06533
HRCT1	235496_at	mRNA	1.4e-06	1.37e-07	1.06598
MCM3	201555_at	mRNA	3.42e-13	2.69e-15	1.07405
KIF2C	209408_at	mRNA	1.12e-08	5.3e-10	1.07724
DCAF4L2	1553197_at	mRNA	0.00404	0.00132	1.07859
HSPB1	201841_s_at	mRNA	1.88e-10	4.41e-12	1.08534
HMGB2	208808_s_at	mRNA	3.24e-10	8.24e-12	1.08697
C1orf43	1555225_at	mRNA	9.02e-14	5.44e-16	1.09163
TIGD1	1553099_at	mRNA	2.23e-10	5.35e-12	1.09264
TTC9	213172_at	mRNA	1.9e-07	1.39e-08	1.09479
BAG2	209406_at	mRNA	1.44e-07	1e-08	1.0978
AKR1C3	209160_at	mRNA	1.75e-08	8.81e-10	1.10164
THBS4	204776_at	mRNA	4.25e-06	4.91e-07	1.10714
PRIM1	205053_at	mRNA	2.36e-11	3.86e-13	1.11036
GTSF1	227711_at	mRNA	0.000998	0.000262	1.11347
FOXM1	202580_x_at	mRNA	1.23e-09	3.96e-11	1.12036
TPR	1557227_s_at	mRNA	6.12e-12	7.79e-14	1.12261
STIL	205339_at	mRNA	2.33e-12	2.56e-14	1.12687
CTNNA2	205373_at	mRNA	0.000234	4.89e-05	1.12719
TOMM40L	226059_at	mRNA	1.12e-10	2.41e-12	1.12769
SLC38A6	214830_at	mRNA	4.29e-10	1.14e-11	1.13161
DLG5	201681_s_at	mRNA	2.13e-09	7.56e-11	1.13379
TXNRD1	201266_at	mRNA	1.76e-08	8.85e-10	1.134
MMP12	204580_at	mRNA	0.00427	0.00141	1.1345
RBP7	238066_at	mRNA	9.63e-10	2.97e-11	1.13575
TOX3	214774_x_at	mRNA	0.00015	2.93e-05	1.14185
MCM6	201930_at	mRNA	9.21e-12	1.26e-13	1.14972
ISX	232707_at	mRNA	1.45e-05	2e-06	1.15173
SPARCL1	200795_at	mRNA	1.75e-05	2.47e-06	1.15686
NRCAM	204105_s_at	mRNA	0.00088	0.000226	1.15813
TKT	208699_x_at	mRNA	2.41e-08	1.28e-09	1.16585
MTFR2	228069_at	mRNA	3.8e-10	9.91e-12	1.16752
FANCI	213007_at	mRNA	1.44e-09	4.75e-11	1.16814
AURKA	204092_s_at	mRNA	2.09e-09	7.4e-11	1.17177
TRIP13	204033_at	mRNA	4.84e-12	5.97e-14	1.17257
ANLN	1552619_a_at	mRNA	6.24e-09	2.69e-10	1.17412
STK39	202786_at	mRNA	2.22e-05	3.25e-06	1.18036
CDC7	204510_at	mRNA	4.42e-10	1.18e-11	1.18447
GREB1	205862_at	mRNA	6.18e-05	1.05e-05	1.18508
C1orf112	220840_s_at	mRNA	3.27e-12	3.8e-14	1.19232
RFC4	204023_at	mRNA	2.2e-13	1.55e-15	1.19328
EML6	229656_s_at	mRNA	9.22e-10	2.81e-11	1.20599
CEP55	218542_at	mRNA	3.18e-08	1.76e-09	1.20677
SERPINI1	205352_at	mRNA	6.38e-09	2.76e-10	1.20789
KPNA2	201088_at	mRNA	5.3e-14	2.91e-16	1.2139
SPC25	209891_at	mRNA	2.38e-08	1.26e-09	1.23538
CDKN2A	207039_at	mRNA	7.91e-08	5.02e-09	1.23643
KIF18B	222039_at	mRNA	2.85e-09	1.06e-10	1.24326
NQO1	201467_s_at	mRNA	0.00018	3.62e-05	1.26278
SMPX	219772_s_at	mRNA	3.84e-05	6.11e-06	1.27237
UBE2C	202954_at	mRNA	4.09e-10	1.08e-11	1.27271
SLC26A2	205097_at	mRNA	1.78e-12	1.85e-14	1.28133
CLGN	205830_at	mRNA	0.000265	5.66e-05	1.29848
TRIM71	231310_at	mRNA	8.6e-05	1.54e-05	1.30661
EBF1	227646_at	mRNA	6.76e-11	1.33e-12	1.30907
TP53I3	210609_s_at	mRNA	3.75e-11	6.64e-13	1.31574
E2F7	228033_at	mRNA	4.97e-09	2.06e-10	1.31803
MCM8	224320_s_at	mRNA	7.98e-14	4.66e-16	1.32186
SMYD3	218788_s_at	mRNA	2.23e-09	7.97e-11	1.33657
FGF13	205110_s_at	mRNA	2.08e-05	3.02e-06	1.34097
ALDH3A1	205623_at	mRNA	0.00173	0.000493	1.34715
FABP5	202345_s_at	mRNA	2.73e-08	1.48e-09	1.34766
KIF11	204444_at	mRNA	7.21e-10	2.12e-11	1.35728
RUNX1	1563591_at	mRNA	0.000494	0.000116	1.35878
PODXL	201578_at	mRNA	1.83e-14	8.55e-17	1.36069
HELLS	220085_at	mRNA	5.91e-09	2.53e-10	1.36375
STXBP6	220994_s_at	mRNA	2.11e-11	3.34e-13	1.36471
XK	206698_at	mRNA	6.97e-05	1.21e-05	1.36686
CDKN2C	204159_at	mRNA	3.13e-13	2.41e-15	1.38783
ITGA6	201656_at	mRNA	2.4e-16	4.79e-19	1.39437
MAGEA1	207325_x_at	mRNA	8.53e-05	1.52e-05	1.4025
PAGE4	205564_at	mRNA	0.000297	6.46e-05	1.40414
CCNE2	205034_at	mRNA	7.91e-10	2.35e-11	1.41551
DEPDC1B	226980_at	mRNA	1.44e-09	4.73e-11	1.41903
CD109	226545_at	mRNA	2.93e-07	2.27e-08	1.43432
MSH2	209421_at	mRNA	3.93e-17	6.4e-20	1.43788
FLVCR1	222906_at	mRNA	7.5e-14	4.34e-16	1.47126
MELK	204825_at	mRNA	1.03e-13	6.27e-16	1.47937
DLGAP5	203764_at	mRNA	1.89e-10	4.42e-12	1.52214
CENPA	204962_s_at	mRNA	4.16e-11	7.52e-13	1.54167
E2F8	219990_at	mRNA	4.01e-11	7.17e-13	1.5501
PTTG1	203554_x_at	mRNA	2.49e-14	1.21e-16	1.55223
MAGEA12	210467_x_at	mRNA	5.89e-05	9.94e-06	1.55602
COL4A1	211980_at	mRNA	6.56e-14	3.72e-16	1.56052
CENPK	222848_at	mRNA	3.66e-12	4.3e-14	1.59206
GPR158	232195_at	mRNA	3.84e-12	4.59e-14	1.5938
CDC20	202870_s_at	mRNA	4.85e-11	9.02e-13	1.60166
BUB1	209642_at	mRNA	3.81e-11	6.78e-13	1.60505
S100P	204351_at	mRNA	0.000761	0.000191	1.6089
APOBEC3A	206632_s_at	mRNA	1.71e-08	8.59e-10	1.6092
RAD51AP1	204146_at	mRNA	1.43e-13	9.23e-16	1.62154
EZH2	203358_s_at	mRNA	2.46e-16	4.96e-19	1.63887
CENPW	226936_at	mRNA	3.62e-16	7.84e-19	1.65478
TTK	204822_at	mRNA	1.93e-11	2.97e-13	1.66356
DKK1	204602_at	mRNA	0.00142	0.000394	1.67174
UBE2T	223229_at	mRNA	2.01e-14	9.58e-17	1.67358
UBD	205890_s_at	mRNA	2.72e-06	2.92e-07	1.6793
HOXA13	231786_at	mRNA	1.3e-07	8.96e-09	1.69256
ESM1	208394_x_at	mRNA	7.9e-14	4.6e-16	1.69573
KIF4A	218355_at	mRNA	1.03e-12	9.81e-15	1.70735
ZWINT	204026_s_at	mRNA	1.16e-12	1.13e-14	1.71068
SQLE	209218_at	mRNA	1.9e-09	6.62e-11	1.75229
COX7B2	231265_at	mRNA	2.75e-05	4.15e-06	1.76266
SULT1C2	205342_s_at	mRNA	3.11e-06	3.43e-07	1.76792
CCNB2	202705_at	mRNA	1.23e-13	7.7e-16	1.76877
NDC80	204162_at	mRNA	5.48e-15	1.94e-17	1.7879
CENPU	218883_s_at	mRNA	2.03e-13	1.4e-15	1.80414
LYZ	1555745_a_at	mRNA	3.04e-05	4.65e-06	1.8239
NCAPG	218662_s_at	mRNA	4.11e-13	3.36e-15	1.82566
LCN2	212531_at	mRNA	1.44e-05	1.99e-06	1.84245
UHRF1	225655_at	mRNA	1.29e-13	8.13e-16	1.84663
DNAJC6	204720_s_at	mRNA	4.47e-13	3.69e-15	1.86527
FAM72A	225834_at	mRNA	1.04e-14	4.23e-17	1.86848
KIF20A	218755_at	mRNA	3.14e-13	2.42e-15	1.88382
SSX1	206626_x_at	mRNA	1.21e-06	1.15e-07	1.89449
NUSAP1	218039_at	mRNA	3.83e-17	6.17e-20	1.89466
NUF2	223381_at	mRNA	2.01e-11	3.13e-13	1.9112
GINS1	206102_at	mRNA	6.96e-14	3.98e-16	1.92533
FAM83D	225687_at	mRNA	2.34e-13	1.67e-15	1.92558
CCL20	205476_at	mRNA	8.03e-06	1.02e-06	1.95085
REG3A	205815_at	mRNA	0.00075	0.000188	1.96706
RACGAP1	222077_s_at	mRNA	2.22e-19	2.03e-22	2.0024
ROBO1	213194_at	mRNA	6.63e-13	5.79e-15	2.02494
CDK1	203213_at	mRNA	4.71e-14	2.47e-16	2.02949
ECT2	219787_s_at	mRNA	2.04e-16	3.95e-19	2.039
ZIC2	223642_at	mRNA	2.92e-09	1.09e-10	2.04572
BUB1B	203755_at	mRNA	7.27e-15	2.69e-17	2.0495
CCNB1	214710_s_at	mRNA	1.58e-14	7.03e-17	2.05386
PRC1	218009_s_at	mRNA	2.12e-16	4.14e-19	2.08587
SPP1	209875_s_at	mRNA	4.63e-06	5.43e-07	2.10148
RBM24	235004_at	mRNA	2.38e-10	5.74e-12	2.1119
MAGEA3	209942_x_at	mRNA	6.38e-05	1.09e-05	2.12012
DTL	218585_s_at	mRNA	3.23e-15	1.02e-17	2.19733
PBK	219148_at	mRNA	8.38e-14	4.95e-16	2.21781
HMMR	207165_at	mRNA	8.58e-18	1.22e-20	2.22024
CDKN3	1555758_a_at	mRNA	1.19e-16	2.13e-19	2.23694
NEK2	204641_at	mRNA	2.47e-15	7.33e-18	2.31466
CTHRC1	225681_at	mRNA	4.08e-08	2.35e-09	2.3372
CAP2	212551_at	mRNA	3.31e-21	2e-24	2.35199
RRM2	201890_at	mRNA	4.35e-18	5.65e-21	2.75129
ACSL4	202422_s_at	mRNA	1.83e-11	2.79e-13	2.81382
ASPM	219918_s_at	mRNA	3.95e-19	3.9e-22	2.85964
COL15A1	203477_at	mRNA	1.87e-18	2.32e-21	2.96806
AKR1B10	206561_s_at	mRNA	7.86e-08	4.98e-09	3.06801
TOP2A	201291_s_at	mRNA	1.2e-20	8.55e-24	3.26196
SPINK1	206239_s_at	mRNA	1.34e-08	6.49e-10	3.65628
GPC3	209220_at	mRNA	2.51e-13	1.84e-15	3.84784
FDR, false discovery rate; FC, fold change; lncRNA, long non-coding RNA.
